# Supplementary material for: Opuntia ficus-indica as an Ingredient in New Functional Pasta: Consumer Preferences in Italy
Source: PubMed Central journal article supplement (PMC8068382; doi:10.3390/foods10040803), 2021-04-08
Supplement: foods-10-00803-s001.pdf [file foods-10-00803-s001.pdf]

## The questionnaire

Table S1. Variables used in the questionnaire.

| Item groups                                                                   | Items                                                                                  | Issues                                                                                                             | Source |
|-------------------------------------------------------------------------------|----------------------------------------------------------------------------------------|--------------------------------------------------------------------------------------------------------------------|--------|
| <b>Section 1: consumers' habits about food (mean score on 10-point scale)</b> |                                                                                        |                                                                                                                    |        |
| 1                                                                             |                                                                                        | Responsibility for the grocery shopping in family (0=no, 1=yes)                                                    |        |
| 2                                                                             | Aspects you pay attention when you consume food<br>(Health aspects)                    | The hygienic requirements of food (hygienic)                                                                       | [1–8]  |
|                                                                               |                                                                                        | The effects on human health (health_effects)                                                                       |        |
|                                                                               |                                                                                        | The caloric intake of food (caloric)                                                                               |        |
|                                                                               |                                                                                        | The food protein intake (proteic)                                                                                  |        |
|                                                                               |                                                                                        | The food fat intake (fat)                                                                                          |        |
|                                                                               |                                                                                        | The environmental impact of food consumption (environmental_impact)                                                |        |
|                                                                               |                                                                                        | The geographic origin of food (geographic)                                                                         |        |
|                                                                               |                                                                                        | The food and culinary traditions (traditions)                                                                      |        |
|                                                                               |                                                                                        | The social impact of food consumption (social_impact)                                                              |        |
|                                                                               |                                                                                        | The production method of food (production_method)                                                                  |        |
|                                                                               |                                                                                        | The seasonality of food (seasons)                                                                                  |        |
| 3                                                                             | Agreement or disagreement with the following statements<br>(Food neophobia)            | I am very particular about the foods I will eat (attention)                                                        | [9]    |
|                                                                               |                                                                                        | I like to try new ethnic restaurants (ethnic_restaurant*)                                                          |        |
|                                                                               |                                                                                        | If I don't know what is in a food, I won't try it" (no_try)                                                        |        |
|                                                                               |                                                                                        | I am constantly sampling new and different foods (new*)                                                            |        |
|                                                                               |                                                                                        | I like foods from different cultures (different_culture*)                                                          |        |
|                                                                               |                                                                                        | At dinner parties, I will try a new food (new_food*)                                                               |        |
|                                                                               |                                                                                        | Ethnic food looks too weird to eat (strange)                                                                       |        |
|                                                                               | I don't trust new food (do not trust)                                                  |                                                                                                                    |        |
|                                                                               | I am afraid to eat things I have never had before (fear)                               |                                                                                                                    |        |
| 4                                                                             | Agreement or disagreement with the following statements<br>(Food technology neophobia) | I don't have enough knowledge on effects of new food technologies on human health<br>(don't_know_effect on health) | [9]    |
|                                                                               |                                                                                        | New food technologies decrease the natural quality of food (low_quality)                                           |        |

|                                                                                                                  |                                                                                                                                                                  |                                                                                                                                                                                                                                                                                                                                                                                                                                                                                                                                                                                                                                                                                                                                                                                                                                                                                                                                                                                                                                                                                                                                                                                                                                                                                                                                                                                   |        |
|------------------------------------------------------------------------------------------------------------------|------------------------------------------------------------------------------------------------------------------------------------------------------------------|-----------------------------------------------------------------------------------------------------------------------------------------------------------------------------------------------------------------------------------------------------------------------------------------------------------------------------------------------------------------------------------------------------------------------------------------------------------------------------------------------------------------------------------------------------------------------------------------------------------------------------------------------------------------------------------------------------------------------------------------------------------------------------------------------------------------------------------------------------------------------------------------------------------------------------------------------------------------------------------------------------------------------------------------------------------------------------------------------------------------------------------------------------------------------------------------------------------------------------------------------------------------------------------------------------------------------------------------------------------------------------------|--------|
|                                                                                                                  |                                                                                                                                                                  | There is no sense in trying out high-tech food products because the ones I eat are already good enough" (good_enough)                                                                                                                                                                                                                                                                                                                                                                                                                                                                                                                                                                                                                                                                                                                                                                                                                                                                                                                                                                                                                                                                                                                                                                                                                                                             |        |
|                                                                                                                  |                                                                                                                                                                  | The benefits of new food technologies to reduce world hunger are often overstated (world_hunger_overstimated)                                                                                                                                                                                                                                                                                                                                                                                                                                                                                                                                                                                                                                                                                                                                                                                                                                                                                                                                                                                                                                                                                                                                                                                                                                                                     |        |
|                                                                                                                  |                                                                                                                                                                  | The environmental benefits of new food technologies are often overstated (environmental_benefits_overstimated)                                                                                                                                                                                                                                                                                                                                                                                                                                                                                                                                                                                                                                                                                                                                                                                                                                                                                                                                                                                                                                                                                                                                                                                                                                                                    |        |
|                                                                                                                  |                                                                                                                                                                  | New food technologies are unnecessary (no_tecnology)                                                                                                                                                                                                                                                                                                                                                                                                                                                                                                                                                                                                                                                                                                                                                                                                                                                                                                                                                                                                                                                                                                                                                                                                                                                                                                                              |        |
| <b>Section 2: consumers' habits about pasta choices</b>                                                          |                                                                                                                                                                  |                                                                                                                                                                                                                                                                                                                                                                                                                                                                                                                                                                                                                                                                                                                                                                                                                                                                                                                                                                                                                                                                                                                                                                                                                                                                                                                                                                                   |        |
| 5                                                                                                                | Frequency of durum wheat pasta consumption (0= never; 1=once a month; 2=once a week; 3= twice a week; 4= more than twice a week; 5= every day)                   | never<br>once a month<br>once a week<br>twice a week<br>more than twice a week<br>every day                                                                                                                                                                                                                                                                                                                                                                                                                                                                                                                                                                                                                                                                                                                                                                                                                                                                                                                                                                                                                                                                                                                                                                                                                                                                                       | [1]    |
| 6                                                                                                                | Periodicity of other pasta types consumption (0= never; 1=once a month; 2=once a week; 3= twice a week; 4= more than twice a week; 5= every day) (Type of pasta) | organic pasta<br>integral pasta<br>fresh pasta<br>stuffed pasta<br>egg pasta<br>frozen pasta cooked<br>pasta cooked<br>pasta with added vitamins<br>Kamut® wheat pasta                                                                                                                                                                                                                                                                                                                                                                                                                                                                                                                                                                                                                                                                                                                                                                                                                                                                                                                                                                                                                                                                                                                                                                                                            | [1]    |
| 7                                                                                                                | Places of consumption                                                                                                                                            | at home<br>out of home -bars, restaurants<br>both                                                                                                                                                                                                                                                                                                                                                                                                                                                                                                                                                                                                                                                                                                                                                                                                                                                                                                                                                                                                                                                                                                                                                                                                                                                                                                                                 | [1]    |
| 8                                                                                                                | Knowledge of origin of durum wheat used to make the consumed pasta                                                                                               | I don't know<br>wheat cultivated only in Italy<br>wheat cultivated only in the Southern Italy regions<br>wheat cultivated abroad<br>wheat cultivated both in Italy and abroad                                                                                                                                                                                                                                                                                                                                                                                                                                                                                                                                                                                                                                                                                                                                                                                                                                                                                                                                                                                                                                                                                                                                                                                                     | [1]    |
| 9                                                                                                                | Agreement or disagreement with the following statements (Italian pasta tradition)                                                                                | The origin of the wheat is a qualitative indicator for Pasta (origin as quality indicator)<br>I preference to consume pasta produced with durum wheat cultivated only in Italy (Italian_wheat)<br>I preference to consume pasta produced with durum wheat cultivated only in the South of Italy (Southern_Italy_wheat)<br>I believe Italian pasta is produced only with Italian durum wheat (Italy)<br>I believe Italian pasta is produced with durum wheat cultivated both in Italy and abroad (Italy_and_abroad)<br>I preference to buy pasta with recyclable packaging (recycle_packaging)<br>I believe it is important to have information about benefits effect of pasta (info_health_benefits )<br>I believe it is important to have information about production process of pasta (info_production)<br>I prefer to buy Italian pasta brands regardless of the origin of durum wheat (no_origin)<br>I prefer to buy pasta with a brand linked to an Italian territory with traditions of durum wheat cultivation (territorial_brand)<br>I prefer to buy pasta low environmental impact (low_impact)<br>I prefer to buy pasta with quality certifications (i.e. organic certification etc) (quality_certification)<br>I prefer to buy pasta with healthy certifications (healthy_certification)<br>I prefer to buy pasta with ethical certifications (ethical_certification) | [1]    |
| 10                                                                                                               | Attributes you pay attention when you choose pasta (Attributes of pasta)                                                                                         | Production method (method)<br>Pasta types (type)<br>Origin of durum wheat (origin)<br>Producer brand (pasta_brand)<br>Nutritional information on label (label_nutrition)<br>Color (color)<br>Cooking time (time)<br>Cooking type (cook_type)<br>Quality certifications (quality_certification)<br>Price (price)                                                                                                                                                                                                                                                                                                                                                                                                                                                                                                                                                                                                                                                                                                                                                                                                                                                                                                                                                                                                                                                                   | [1]    |
| <b>Section 3: consumers' behavior towards functional pasta comprising Opuntia (mean score on 10-point scale)</b> |                                                                                                                                                                  |                                                                                                                                                                                                                                                                                                                                                                                                                                                                                                                                                                                                                                                                                                                                                                                                                                                                                                                                                                                                                                                                                                                                                                                                                                                                                                                                                                                   |        |
| 11                                                                                                               |                                                                                                                                                                  | Have you ever heard about functional pasta comprising Opuntia? (Fam) (0=No; 1=Yes)                                                                                                                                                                                                                                                                                                                                                                                                                                                                                                                                                                                                                                                                                                                                                                                                                                                                                                                                                                                                                                                                                                                                                                                                                                                                                                | [9,10] |
| 13                                                                                                               |                                                                                                                                                                  | Have you ever eaten functional pasta comprising Opuntia before? (Cons) (0=No; 1=Yes)                                                                                                                                                                                                                                                                                                                                                                                                                                                                                                                                                                                                                                                                                                                                                                                                                                                                                                                                                                                                                                                                                                                                                                                                                                                                                              |        |
| 14                                                                                                               |                                                                                                                                                                  | Would you be willing to eat functional pasta comprising Opuntia? (Willing) (0=No; 1=Yes)                                                                                                                                                                                                                                                                                                                                                                                                                                                                                                                                                                                                                                                                                                                                                                                                                                                                                                                                                                                                                                                                                                                                                                                                                                                                                          |        |
| 15                                                                                                               | What functional pasta characteristics could affect your decision to eat it? (Functional pasta)                                                                   | If I think to eat functional pasta comprising Opuntia, I'm curious to try it (curiosity)                                                                                                                                                                                                                                                                                                                                                                                                                                                                                                                                                                                                                                                                                                                                                                                                                                                                                                                                                                                                                                                                                                                                                                                                                                                                                          | [1,9]  |

If functional pasta comprising Opuntia produces health benefits, I would eat it (health\_benefits)

If functional pasta comprising Opuntia are more nutrient than conventional pasta, I would eat it (more\_nutrient)

If functional pasta production is less impactful than conventional pasta, I would eat it (low\_env\_impact)

If functional pasta is less expensive than conventional pasta, I would eat it (low\_cost)

If functional pasta is produced by my trusted pasta manufacturing, I would eat it (pasta\_factory)

If I get more information about functional pasta comprising Opuntia, I would eat it (more\_info)

I'm disgusted to the idea of eating functional pasta comprising Opuntia (disgust\*)

**Section 4: sociodemographic information**

|    |                                                                                                                    |
|----|--------------------------------------------------------------------------------------------------------------------|
| 16 | Age                                                                                                                |
| 17 | Gender (0=female; 1=male)                                                                                          |
| 18 | Education : 0=primary or secondary (low education); 1=degree, master and/or PhD (high education)                   |
| 19 | Status (0= unmarried; 1= married; 2= separated/divorced)                                                           |
| 20 | Annual Income (0=< 10,000; 1=10,001 – 20,000; 2=20,001 – 30,000; 3=30,001 – 40,000; 4=40,001 – 50,000; 5=> 50,001) |

\*Reversed coded.

Word in brackets refers to the abbreviation of the variable in the manuscript.

## References

1. Altamore, L.; Ingrassia, M.; Columba, P.; Chironi, S.; Bacarella, S. Italian Consumers' Preferences for Pasta and Consumption Trends: Tradition or Innovation? *J. Int. Food Agribus. Mark.* **2019**, *0*, 1–24.
2. Palmieri, N.; Perito, M.A.; Lupi, C. Consumer acceptance of cultured meat: some hints from Italy. *Br. Food J.* **2020**.
3. Palmieri, N.; Perito, M.A.; Macrì, M.C.; Lupi, C. Exploring consumers' willingness to eat insects in Italy. *Br. Food J.* **2019**, *121*.
4. Palmieri, N.; Forleo, M.B. The potential of edible seaweed within the western diet. A segmentation of Italian consumers. *Int. J. Gastron. Food Sci.* **2020**, 100202.
5. Palmieri, N.; Simeone, M.; Russo, C.; Angela, M. Profiling young consumers' perceptions of GMO products: A case study on Italian undergraduate students. *Int. J. Gastron. Food Sci.* **2020**, *21*, 100224.
6. Palmieri, N.; Suardi, A.; Pari, L. Italian consumers' willingness to pay for eucalyptus firewood. *Sustain.* **2020**, *12*.
7. Palmieri, N.; Suardi, A.; Latterini, F.; Pari, L. The eucalyptus firewood: Understanding consumers' behaviour and motivations. *Agric.* **2020**, *10*, 1–12.
8. Palmieri, N.; Perito, M.A. Consumers' Willingness To Consume Sustainable and Local Wine in Italy. *Ital. J. Food Sci.* **2020**, *32*, 222–233.
9. Verbeke, W. Profiling consumers who are ready to adopt insects as a meat substitute in a Western society. *Food Qual. Prefer.* **2015**, *39*, 147–155.
10. Bouazizi, S.; Montevicchi, G.; Antonelli, A.; Hamdi, M. Effects of prickly pear (*Opuntia ficus-indica* L.) peel flour as an innovative ingredient in biscuits formulation. *LWT* **2020**, *124*.
